# Supplementary material for: Silencing, Positive Selection and Parallel Evolution: Busy History of Primate Cytochromes c
Source: PLoS One. 2011 Oct 18;6(10):e26269. doi: 10.1371/journal.pone.0026269 (PMC3196546; doi:10.1371/journal.pone.0026269)
Supplement: Dataset S1 — List of primer used for amplification and sequencing. (XLS) [file pone.0026269.s001.xls]

## Sheet: Sheet1
DNA sequencing. We obtained and compared the DNA sequence of somatic cyt c from 56 primate and 4 non-primate species. DNA was extracted from blood using phenol/chloroform or a Qiagene® QIAAmp DNA kit. The somatic cyt c was amplified for sequencing by PCR from genomic DNA. PCR and sequencing primers are specific for each primate group and are listed in supplementary table. These primers allow the …
Testis isoform: The localization of the human orthologous region of mouse testis cyt c (Chromosome 2: 76,191,999-76,198,507) was found using the protein genomic alignments function of the Ensemble genome browser (55). The sequences of 5 more primates were found (using alignment on eutherian mammals EPO low coverage). New testis cyt c sequences were obtained by sequencing the PCR product from geno…
In order to know if the duplication of the cyt c gene is older than mammals, we checked the existence of both cyt c isoforms in birds by BLAT Search (57) of chicken (Gallus gallus) (56). In order to confirm that the isoforms found in chicken are homologs of the mammalian isoforms, a tblastn analysis was performed on all genes bordering chicken cyt c for 3 Mb against the human genome.

## Sheet: Strepssirhines
Strepssirhines	These primers were used to amplify the gene					to sequence
	Z10	Z10	Z15	Z15
Cheirogaleus medius (z131)	833F	EXON3-2	Strep_F1	exon3nc-1		T7, SP6
	Z56	Z56	Z56	Z56
Daubentonia madagascariensis (z217)	833F	EXON3-2	Strep_F1	exon3nc-1		T7, SP6
	Z7	Z7	Z15	Z15
Hapalemur griseus (z122)	833F	EXON3-2	Strep_F1	exon3nc-1		T7, SP6
	Z33	Z33	Z51	Z51
Lemur catta (z184)	Strep_F1	exon3nc-1	MammFCYCS	exon3nc-1		T7, SP6
	Z7	Z7	Z27	Z27
Loris tardigradus (z127)	833F	EXON3-2	Strep_F1	Strep_nc		T7, SP6
	Z40	Z40	Z52	Z52
Microcebus murinus (z167)	Prom exon1+2	exon1+2	MammFCYCS	exon3nc-1		T7,SP6,EXON3-2,StrepF1
	Z10	Z10	Z52	Z52
Mirza coquereli (z130)	833F	EXON3-2	MammFCYCS	exon3nc-1		T7, SP6
	Z7	Z7	Z52	Z52
Mirza coquereli (z123)	833F	EXON3-2	MammFCYCS	exon3nc-1		T7, SP6
	Z27D	Z27D
Nycticebus coucang (z178)	833F	Strep_NC				T7,SP6,EXON3-2,Strep_F1
	Z7	Z7	Z14S	Z14S
Otolemur crassicaudatus (z128)	833F	EXON3-2	Strep_F1	exon3nc-1		T7,SP6
	Z7	Z7	Z15	Z15
Otolemur garnetti (z126)	833F	EXON3-2	Strep_F1	exon3nc-1		T7,SP6
	Z7	Z7	Z15	Z15
Perodicticus potto (z124)	833F	EXON3-2	Strep_F1	exon3nc-1		T7,SP6
	Z7	Z7	Z16	Z16
Propithecus verreauxi (z104)	833F	EXON3-2	Strep_F2	exon3nc-1		T7,SP6
	Z7	Z7	Z14S	Z14S
Varecia variegata (z102)	833F	EXON3-2	Strep_F1	exon3nc-1		T7,SP6
PRIMERS
Strep_F1	GGY RCT TAA TGT CAT AGA TTA GCA
Strep_F2	TTG CAC TRT ATT TGT TAC TTG ARG A
Strep_NC	CAC TCW TTC ATG ATC TGA ATT CTG
MammFCYCS	AGC GGC GTG TCC TTG GRC T
Prom exon1+2	ACC GGC GTG TCC TTG GA
833F	TAA TGT GTT CGC CCT TGA GC
Exon3-2	TTG GGA TTC TCC AAA TAC TCC ATC AG

## Sheet: Tarsiers 
Tarsiers	These primers were used to amplify the gene					to sequence
	Z9	Z9	Z44	Z44
Tarsius syrichta (103)	833F	Exon3_nc-2	TAR_F1	TAR_NC		T7,SP6
	Z9	Z9	Z14T	Z14T
Tarsius bancanus (z129)	833F	Exon3_nc-2	TAR_F1	exonnc-2		T7,SP6
PRIMERS
TAR_NC	AGA GAT CAA TTA AAT TAT GGT ACA CAT
TAR_F1	GTT YGA TGK CAT TGA TTA GCA
833F	TAA TGT GTT CGC CCT TGA GC
Exon3_nc-2	TTC ATG ATC TGA ATT CTG GT

## Sheet: NWM
NWM	These primers were used to amplify the gene					to sequence
	Z9	Z9	Z18	Z18
Alouatta belzebul (z106)	833F	Exon3_nc-2	NWM_RF2	Exon nc-1		SP6,T7, nwmFF2, NWMRR2
	Z7	Z7	Z18	Z18
Alouatta seniculus (z120)	833F	EXON3-2	NWM_RF2	Exon nc-1		SP6,T7, nwmFF2, NWMRR2
	Z7	Z7	Z18	Z18
Aotus azarae (z114)	833F	EXON3-2	NWM_RF2	Exon nc-1		SP6,T7, nwmFF2, NWMRR2
	Z71	Z71	Z34	Z34
Ateles paniscus (z208)	Ateles_cyc_f2	Exon3_nc-2	NWM_RF2	Exon nc-1		SP6,T7, nwmFF2, NWMRR2
	Z7	Z7	Z18	Z18
Brachyteles arachnoides (117)	833F	EXON3-2	NWM_RF2	Exon nc-1		SP6,T7,NWMRR2
	Z7	Z7	Z18	Z18
Cacajao rubicundus (z116)	833F	EXON3-2	NWM_RF2	Exon nc-1		SP6,T7, nwmFF2, NWMRR2
	Z9	Z9	Z27b	Z27b
Callicebus donacophilus (z119)	833F	Exon3_nc-2	NWM_RF2	NWM_NC		SP6,T7, nwmFF2, NWMRR2
	Z27c	Z27c
Callimico goeldii (z211)	833F	NWM_NC				SP6,T7, nwmFF2, NWMRR2
	Z7	Z7	Z17	Z17
Callithrix jacchus (z118)	833F	EXON3-2	NWM_RF2	Exon nc-1		SP6,T7,NWMFF1,NWMFF2,NWMRR2
	Z9	Z9	Z27b	Z27b
Cebus apella (z108)	833F	Exon3_nc-2	NWM_RF2	NWM_NC		SP6,T7,NWMRR2
	Z7	Z7	Z18	Z18
Chiropotes satanas (z112)	833F	EXON3-2	NWM_RF2	Exon nc-1		SP6,T7,NWMFF2,NWMRR2
	Z9	Z9	Z18	Z18
Lagothrix lagothricha (z113)	833F	Exon3_nc-2	NWM_RF2	Exon nc-1		SP6,T7,NWMFF1,NWMFF2,NWMRR2
	Z9	Z9	Z18	Z18
Leontopithecus chrysomelas (z121)	833F	Exon3_nc-2	NWM_RF2	Exon nc-1		SP6,T7,NWMFF2,NWMRR2
	Z9	Z9	Z17	Z17
Pithecia irrorata (z107)	833F	Exon3_nc-2	NWM_RF2	Exon nc-1		SP6,T7,NWMFF2,NWMRR2
	Z7	Z7	Z27b	Z27b
Saguinus labiatus (z115)	833F	EXON3-2	NWM_RF2	NWM_NC		SP6,T7,NWMFF2,NWMRR2
	Z7	Z7	Z18	Z18
Saimiri sciureus (z110)	833F	EXON3-2	NWM_RF2	Exon nc-1		SP6,T7,NWMFF2,NWMRR2
PRIMERS
NWM_NC	ATT CTG TCC GTC ATT CAT GAT GT
NWM_RF2	TAA GTG ACT AGA GTG GTC ATT AGT
NWM_FF2	GGT TTC ATC AGT CAC CTT GA
NWM_FF1	AAC CGA AGC GTA GCG TTT CAT
NWM_RR2	ACT AAT GAC CAC TCT AGT CAC TTA
Exon3_nc-2	TTC ATG ATC TGA ATT CTG GT
Ateles_CYCS_F2	GGA AGC CGC ATC KGG TTA RAG
833F	TAA TGT GTT CGC CCT TGA GC
Exon3-2	TTG GGA TTC TCC AAA TAC TCC ATC AG

## Sheet: OWMs
OWM	These primers were used to amplify the gene					to sequence
	Z64	Z64
Cercopithecus galeritus (z215)	promex1+1	exon3nc-1				T7,SP6,NWMFF2,NWMRR2
	Z66	Z66
Cercopithecus cephus (z143)	promex1+1	exon3nc-1				T7,SP6,NWMFF2,NWMRR2
Chlorocebus aethiops	Promex1+2	Exon3nc-2	Promex1+1	Exon3nc-1		Intron1-1755,Exon3nc-2,PromExon1+2,IntronA455
Colobus guereza	Promex1+2	Exon3nc-2	Promex1+1	Exon3nc-1		Exon3nc-2,Promexon1+2,IntronA455,Intron1-1755
Colobus polykomos (LA14)	Promex1+2	Exon3nc-2	IntronA455	PromExon1+1	Exon3nc-1	PromExon1+1,Exon3nc-1,IntronA455
	Z66	Z66
Lophocebus atterimus (z139)	promex1+1	exon3nc-1				T7,SP6,NWMFF2,NWMRR2
Macaca arctoides	Promex1+2	Exon3nc-2	Promex1+1	Exon3nc-1		T7,SP6,NWMFF2,NWMRR2,intron2-1
Macaca cyclopis	Promex1+2	Exon3nc-2	Promex1+1	Exon3nc-1		T7,SP6,NWMFF2,NWMRR2,intron2-1
Macaca nemestrina	Promex1+2	Exon3nc-2	Promex1+1	Exon3nc-1		Exon3nc-2,Promexon1+2,IntronA455,Intron1-1(755)
Mandrillus leucophaeus	Promex1+2	Exon3nc-2				Exon3nc-2,Promexon1+2,IntronA455,Intron1-1(755)
Nasalis larvatus	Promex1+2	Exon3nc-2				T7,SP6,NWMFF2,NWMRR2,intron2-1
Papio anubis	Promex1+2	Exon3nc-2	Promex1+1	Exon3nc-1		T7,SP6,NWMFF2,NWMRR2,877
Papio hamadryas	Promex1+2	Exon3nc-2	Promex1+1	Exon3nc-1		T7,SP6,NWMFF2,NWMRR2,intron2-1
Theropithecus gelada (LA60)	Promex1+2	Exon3nc-2	IntronA455	PromExon1+1	Exon3nc-1	PromExon1+2,Exon3nc-2,Intron1833
Trachypithecus francoisi	Promex1+2	Exon3nc-2	Promex1+1	Exon3nc-1		Exon3nc-2,Promexon1+2,IntronA455,Intron1-1(755)
Trachypithecus obscurus	Promex1+2	Exon3nc-2	Promex1+1	Exon3nc-1		Exon3nc-2,Promexon1+2,IntronA455,Intron1-1(755)
Exon3_nc-2	TTC ATG ATC TGA ATT CTG GT
Prom exon1+2	ACC GGC GTG TCC TTG GA
NWM_FF2	GGT TTC ATC AGT CAC CTT GA
NWM_RR2	ACT AAT GAC CAC TCT AGT CAC TTA
IntronA455	GGG CTA TGG AAA TGA TAG GCA AGA C
Intron1-1(755)	TGT TTC TAC CTG CCC AGG TCA C
Exon3nc-2	TTC ATG ATC TGA ATT CTG GT

## Sheet: Apes
APES	These primers were used to amplify the gene				to sequence
Pan troglodytes	NCBI
Pan paniscus (CRES or310)	Promex1+2	Exon3nc-2	Promex1+1	Exon3nc-1	exon3nc-2,promex1+2,intronA455,Intron1-1(755)
Gorilla gorilla (western lowland) OR802	Promex1+2	Exon3nc-2	Promex1+1	Exon3nc-1	Exon3nc-2,Promexon1+2,IntronA455,Intron1-1(755)
Pongo pygmaea	NCBI				Intron1+2,intron1-2,intron1+3,intron1-1(755)
Hylobates lar	NCBI
Hylobates agilis	Promex1+2	Exon3nc-2	Promex1+1	Exon3nc-1	exon3nc-2,promex1+2,intronA455,exon3nc-1,Intron1-1(755)
Symphalangus syndactylus	NCBI				Intron1+2,intron1-2,intron1+3,intron1-1
Prom exon1+2	ACC GGC GTG TCC TTG GA
Exon3nc-2	TTC ATG ATC TGA ATT CTG GT
IntronA455	GGG CTA TGG AAA TGA TAG GCA AGA C
Intron1-1(755)	TGT TTC TAC CTG CCC AGG TCA C
Intron1-2	TCC TTC TAG GAT GTC AGA ACG ACT GAC
Intron1+2	TGA CAT CCA GGA AAC AGT TTC ATC AG
Intron1+3	CCC TTG AGC TTC AGA TCT GTG

## Sheet: CYC testis
INITCYCTF1:
GCA CCC AAC CCA GTA GGG TCT TTA C
INITCYCTR1:
CTG TCT CAC TTT ACC CTC TTC CC
INITCYCTF2:
GTG GGA GAG AAC CAG ATA CAC TGT AG
INICYCTR2:
CTG GTT CTC TCC CAC AAC TGC TAG
